# Supplementary material for: Simple Controlling Ecofriendly Synthesis of Silver Nanoparticles at Room Temperature Using Lemon Juice Extract and Commercial Rice Vinegar
Source: Hindawi journal article supplement (doi:10.1155/2020/3539701), 2020-05-19
Supplement: f1 [file 3539701.f1.pdf]

## SUPPLEMENT DOCUMENT

*Figure S1: Absorbance spectra of (a) lemon extract and (b) commercial rice vinegar.*

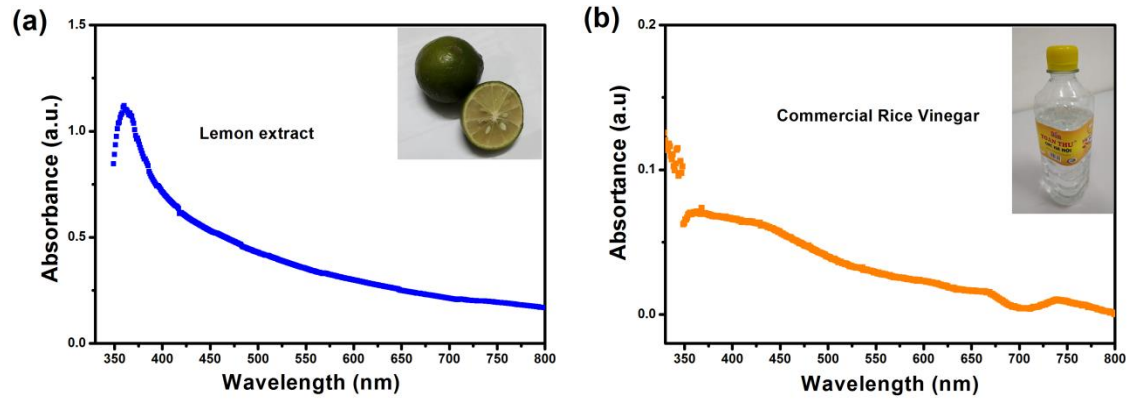

**Figure S2:** The energy dispersive spectroscopy of as-prepared Ag NPs powder (reaction time of 24h, baking time of 48 h). The large content of carbon is due to the carbon tape used in measurement.

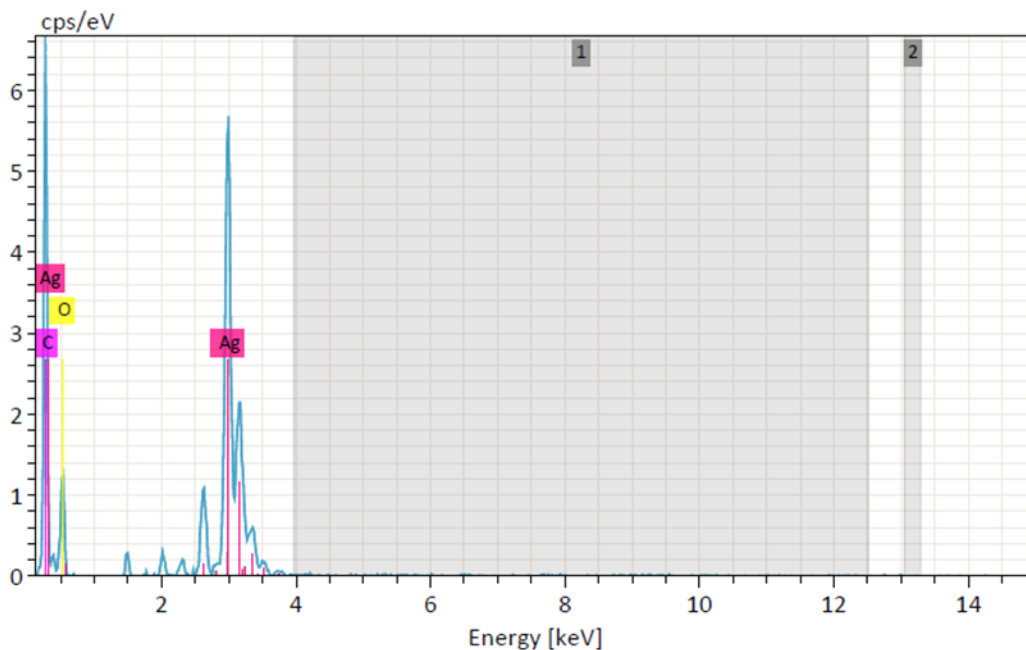

341

| Element | Line s.  | Mass [%]     | Atom [%]      | abs. error [%]<br>(1 sigma) | rel. error [%]<br>(1 sigma) |
|---------|----------|--------------|---------------|-----------------------------|-----------------------------|
| C       | K-Series | 21.95        | 62.74         | 3.06                        | 13.92                       |
| O       | K-Series | 10.95        | 23.49         | 2.01                        | 18.33                       |
| Ag      | L-Series | 43.28        | 13.77         | 1.41                        | 3.26                        |
|         |          | <b>76.18</b> | <b>100.00</b> |                             |                             |

The elemental composition was analyzed using Energy-dispersive X-ray spectroscopy (EDS). Fig. S2 and Table show noticeable peaks. The highest peak is of silver. Aside, the peaks of carbon and oxygen elements are shown in EDS analysis which may be due to the fact that during the synthesis process an amount of oxygen from the environment and participation of lemon juice extract phytochemical groups in reducing and capping of the synthesised AgNPs. Thus, these results confirm the formation of silver nanoparticles.
